# Supplementary material for: Organocatalytic synthesis of astaxanthin-containing poly(lactide)s
Source: Royal Society of Chemistry journal article supplement (doi:10.1039/c0py00227e), 2010-12-20
Supplement: c0py00227e.pdf [file c0py00227e.pdf]

## Organocatalytic synthesis of astaxanthin-containing poly(lactide)s

Helen Middleton, David M. Haddleton and Andrew P. Dove\*

*Department of Chemistry, University of Warwick, Coventry, UK, CV4 7AL.*

### Supplementary Information

- Figure S1.** First order kinetic plots for astaxanthin-initiated polymerization of lactide catalyzed by **1** ( $R = [\text{monomer}]/[\text{initiator}]$ ). 2
- Figure S2.** Chart of polydispersity against time for astaxanthin-initiated poly(lactide) catalyzed by **1** (Target DP = 50) 2
- Figure S3.** Chart of polydispersity against time for pyrenebutanol-initiated poly(lactide) catalyzed by **1** (Target DP = 50) 3
- Figure S4.** MALDI-TOF spectra for pyrenebutanol-initiated poly(lactide) (Target DP = 50) at 3 and 36 days 3

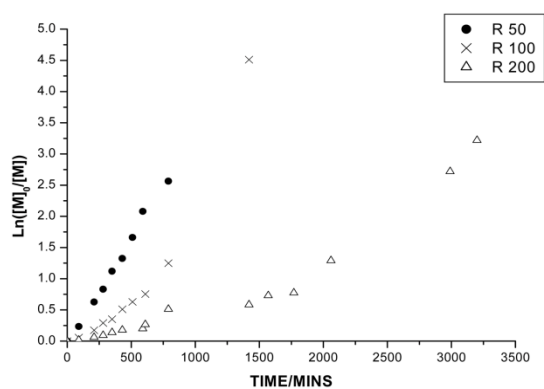

**Figure S1.** First order kinetic plots for astaxanthin-initiated polymerization of lactide catalyzed by **1** ( $R = [\text{monomer}]/[\text{initiator}]$ ).

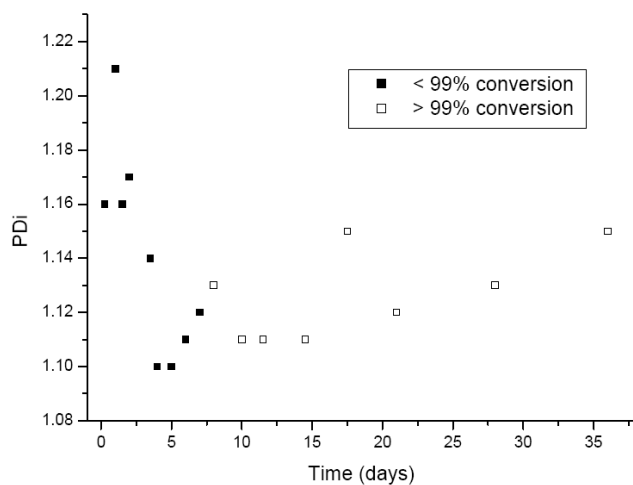

**Figure S2.** Chart of polydispersity against time for astaxanthin-initiated poly(lactide) catalyzed by **1** (Target DP = 50).

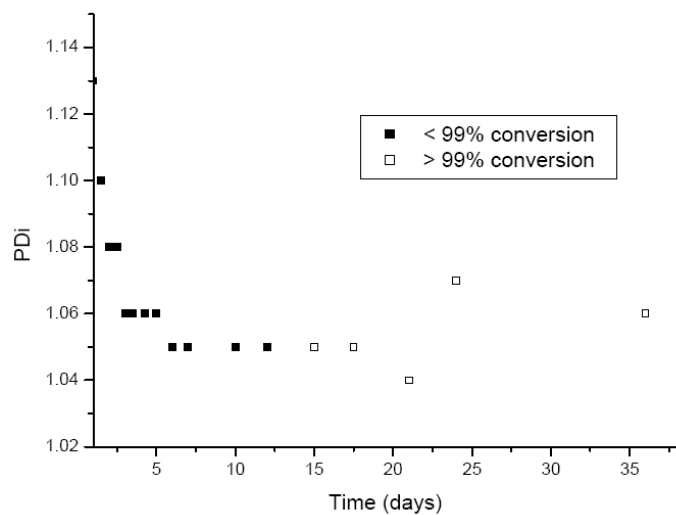

**Figure S3.** Chart of polydispersity against time for pyrenebutanol-initiated poly(lactide) catalyzed by **1** (Target DP = 50)

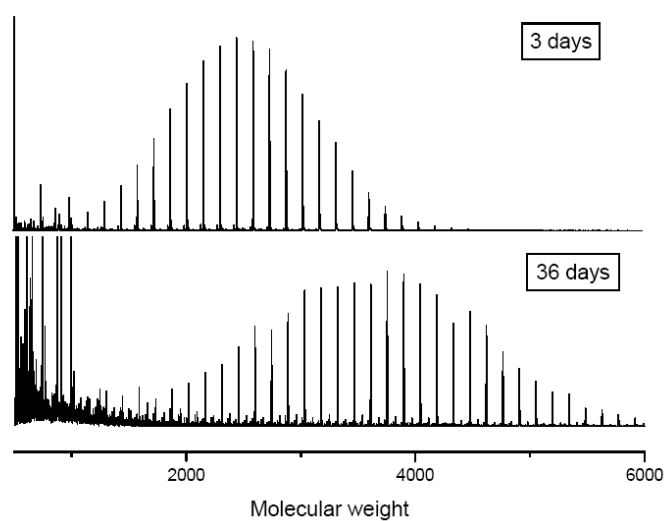

**Figure S4.** MALDI-TOF spectra for pyrenebutanol-initiated poly(lactide) (Target DP = 50) at 3 and 36 days.
